# Supplementary material for: A new approach towards the synthesis of nitrogen-doped graphene/MnO2hybrids for ultralong cycle-life lithium ion batteries
Source: Royal Society of Chemistry journal article supplement (doi:10.1039/c4ta07208a), 2015-01-01
Supplement: c4ta07208a1.pdf [file c4ta07208a1.pdf]

## **Supporting Information**

### **A New Approach towards Nitrogen-Doped Graphene and Their Hybrids for Ultralong Cycle-Life Lithium Ion Batteries**

Tingzhou Yang, Tao Qian,\* Mengfan Wang, Jie Liu, Jinqiu Zhou, Zhouzhou Sun,  
Muzi Chen, Chenglin Yan\*

College of Physics, Optoelectronics and Energy & Collaborative Innovation Center of  
Suzhou Nano Science and Technology, Soochow University, Suzhou 215006, China.

Email: c.yan@suda.edu.cn (C. Yan); tqian@suda.edu.cn (T. Qian)

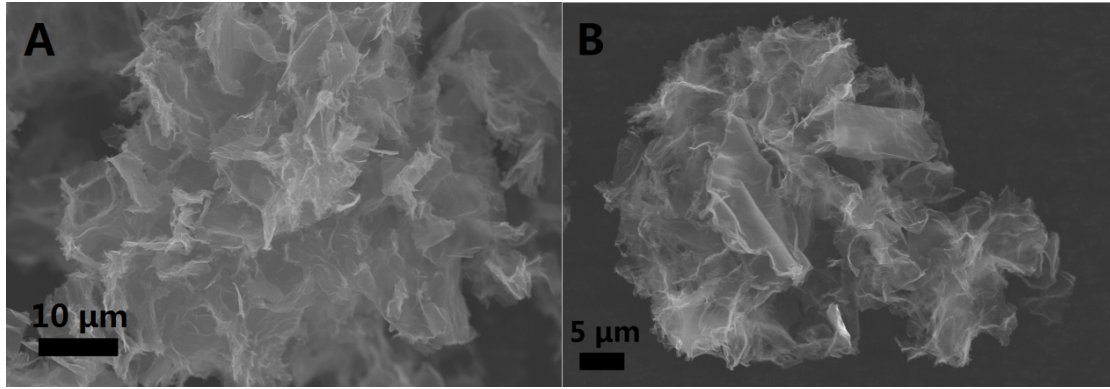

Fig. S1. SEM images of (A) PPy/GO and (B) N-doped graphene.

200 mg PPy/GO nanostructures was annealed in a quartz tube, and about 37.4 mg N-doped graphene was obtained after the carbonization process, which revealed that the mass loading of the PPy was about 81.3%.

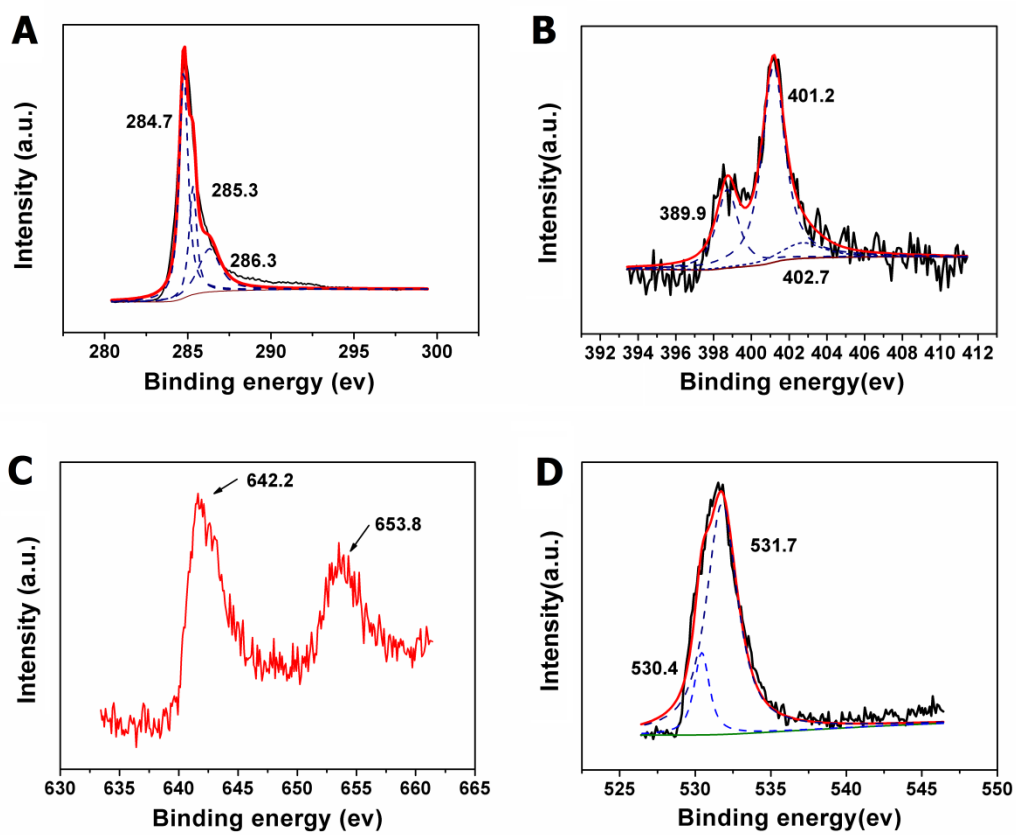

Fig. S2. The high resolution (A) C1s, (B) N1s, (C) Mn2p, and (D) O1s XPS spectra of the MnO<sub>2</sub>/NG.

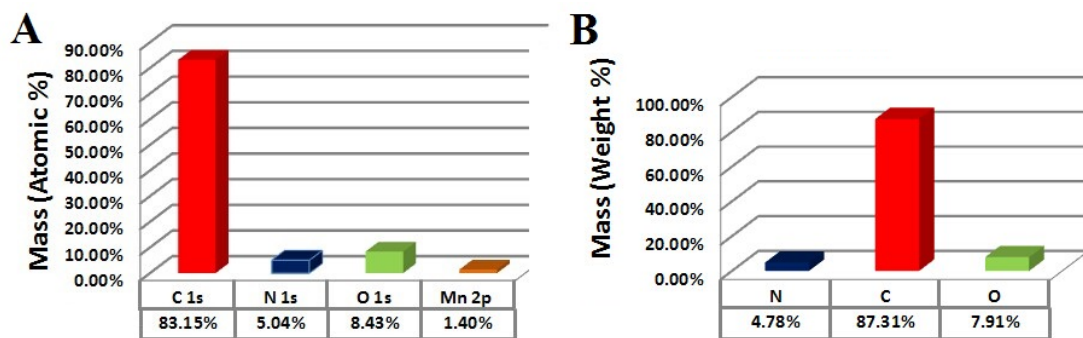

Fig. S3. (A) The element content of the MnO<sub>2</sub>/NG by the x-ray photoelectron spectrometer. (B) The element content of the N-doped graphene by the elemental analysis.

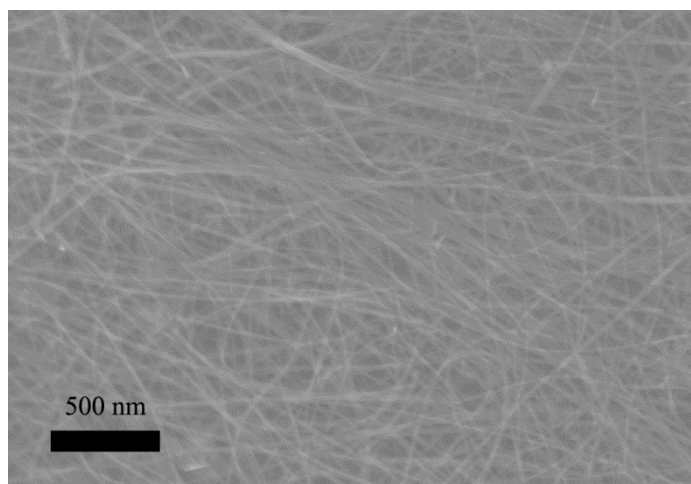

Fig. S4. SEM of pure MnO<sub>2</sub> with similar structures.

**Synthesis of pure MnO<sub>2</sub>:** pure MnO<sub>2</sub> was synthesized by mixing 11 mg KMnO<sub>4</sub> in 10 mL of deionized water under adequate stirring, and then maintained for 24 h in teflon-lined stainless steel autoclave at 220 °C.

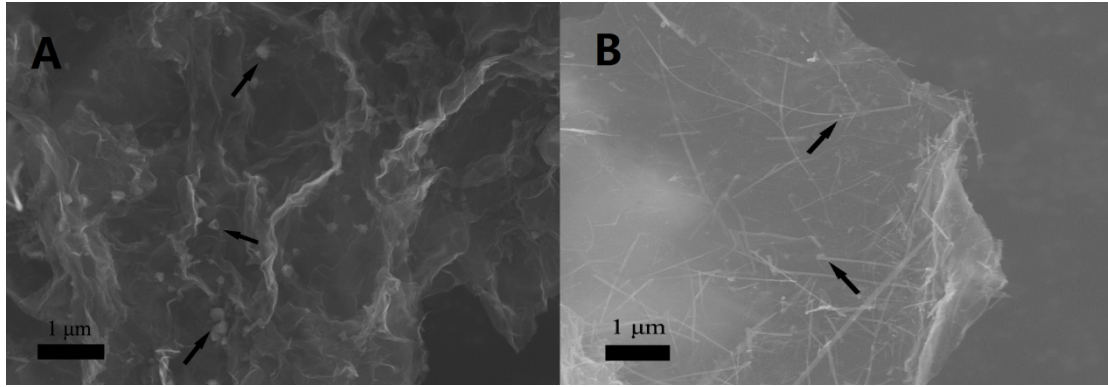

Fig. S5. SEM images of MnO<sub>2</sub> nanorodes grown on the N-doped graphene sheets with hydrothermal reaction for (A) 20 min, and (B) 60 min.

To prove the formation mechanism of MnO<sub>2</sub> nanorods, we try to investigate the morphology of the MnO<sub>2</sub> nanorods with various hydrothermal reaction times. Fig. S5A shows point-like objects grown on the surface of the N-doped graphene after 20 min, which was served as the seeds to grow the MnO<sub>2</sub> nanorods. After reaction 60 min, MnO<sub>2</sub> nanorods with relative small diameters could be observed in Fig. S5B, these phenomena illustrate the formation process of MnO<sub>2</sub> nanorodes on the surface of N-doped graphene.

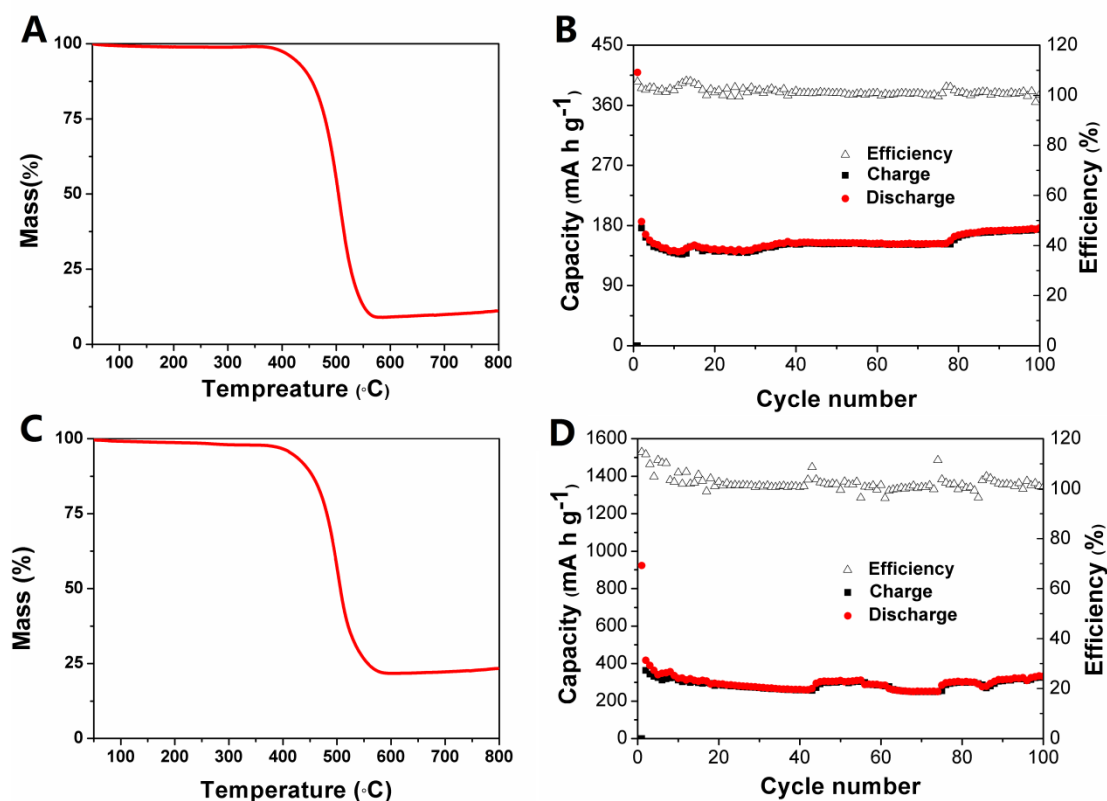

Fig. S6. The TGA between 0 °C and 800 °C at an increasing rate of 10 °C min<sup>-1</sup>. The contents of the MnO<sub>2</sub> are about the (A) 9.3% and (C) 21.6 %, which delivered a reversible capacity of (B) 136.7 mA h g<sup>-1</sup> and (D) 260 mA h g<sup>-1</sup> by measuring at 300 mA g<sup>-1</sup>.

The influence of the MnO<sub>2</sub> content on the electrochemical performance has been considered, and we find that the capacity of hybrids increases with the mass loading of MnO<sub>2</sub> nanorods. We also have tried to further improve the MnO<sub>2</sub> content with excessive precursor (KMnO<sub>4</sub>), but failed. To confirm the good electrochemical properties of the electrodes, the data of hybrids with different mass loadings of MnO<sub>2</sub> have been presented in the revised supporting information.
